# Supplementary material for: Huang-Lian-Jie-Du-Decoction alleviates atherosclerotic plaque and lipid profile in HFD-induced ApoE-/- mice involve the gut microbiota-mediated TMA/FMO3/TMAO axis
Source: Research Square preprint supplement (doi:10.21203/rs.3.rs-6997421/v1), 2025-07-23
Supplement: Supplementary file 1 [file Docking_parameters.xlsx]

## Sheet: Sheet1
Numbering	Target	Organism	Database	ID	Docking approaches	Binding pocket	Pocket acquisition	Grid box center			Grid box size			Exhaustiveness	Optimal structure pose
								x	y	z	x	y	z		H-bond	pi-cation	pi-pi	Binding energy
1	FMO3	Homo sapiens	AlphaFold3	noid	Semi-flexible docking，Site-directed docking	Prediction	P2rank	3.3	6.6	5.4	40.9	32.8	34	32
