# Supplementary material for: Huang-Lian-Jie-Du-Decoction alleviates atherosclerotic plaque and lipid profile in HFD-induced ApoE-/- mice involve the gut microbiota-mediated TMA/FMO3/TMAO axis
Source: Research Square preprint supplement (doi:10.21203/rs.3.rs-6997421/v1), 2025-07-23
Supplement: Supplementary file 2 [file Raw_Data_Biochemical_Indicators_and_FMO3.xlsx]

## Sheet: Body Weight
	Week11	Week12	Week13	Week14	Week15	Week16
NC	21.68	23.02	20.99	21.34	21.46	21.67
	22.06	22.4	20.71	21.79	22.01	21.33
	19.38	19.68	19.02	19.71	20.05	19.58
	21.02	20.91	21.01	21.04	21.13	21.12
	20.59	21.46	21.57	22.17	19.4	18.87
Average value	20.946	21.494	20.66	21.21	20.81	20.514
Standard deviation	1.04455	1.30214	0.968452	0.942576	1.06426	1.21907
HFDM	30.61	30.96	31.06	32.25	32.28	30.12
	29.05	29.72	30.02	30.35	30.41	28.55
	32.01	32.66	33.19	34.25	34.37	30.13
	31.12	31.1	31.61	32.04	31.39	31.03
	33.09	34.52	34.09	33.59	34.38	33.29
Average value	31.176	31.792	31.994	32.496	32.566	30.624
Standard deviation	1.51677	1.84795	1.63861	1.51221	1.77891	1.73723
HLJDD_L	27.02	27.67	26.89	26.68	27.58	26.28
	32.4	33.08	27.51	30.95	32.73	30.8
	27.42	27.78	27.83	27.84	28.31	27.42
	31.76	32.22	31.85	32.11	27.42	23.04
	31.06	30.75	28.96	29.95	30.25	28.56
Average value	29.932	30.3	28.608	29.506	29.258	27.22
Standard deviation	2.52462	2.49422	1.96194	2.22626	2.24341	2.87263
HLJDD_M	30.88	31.23	30.35	30.73	30.71	27.98
	30.82	30.22	30.08	30.15	30.89	28.99
	29.74	29.06	28.31	28.44	28.76	27.4
	32.83	32.84	32.25	32.02	31.77	30.67
	30.32	31.46	31.11	30.2	30.26	29.02
Average value	30.918	30.962	30.42	30.308	30.478	28.812
Standard deviation	1.16319	1.41553	1.44893	1.28793	1.10588	1.2463
HLJDD_H	28.43	29.03	28.87	29.51	29.95	27.65
	31.3	30.86	30.84	30.38	30.94	29.21
	29.17	29.92	30.31	30.08	31.35	29.1
	30.83	31.64	31.41	30.66	31.58	29.73
	30.45	30.14	29.97	29.65	29.61	27.73
Average value	30.036	30.318	30.28	30.056	30.686	28.684
Standard deviation	1.19674	0.986215	0.958593	0.483042	0.86662	0.938499
ST	31.61	31.34	31.35	31.27	31.06	29.8
	32.37	32.39	32.49	32.23	32.74	31.73
	31.85	31.81	32.65	32.07	33.01	32.38
	31.8	31.94	31	31.61	32.06	29.68
	31.85	31.71	31.21	31.78	32.44	30.32
Average value	31.896	31.838	31.74	31.792	32.262	30.782
Standard deviation	0.282807	0.380881	0.769935	0.379104	0.759157	1.20877

## Sheet: Liver to Body Weight Ratio
	Liver wet weight	Body weight (week16)	Liver wet weight/Body weight (%)	Average value	Standard deviation
NC	0.835	19.58	4.26456	3.89055	0.529546
	0.869	19.23	4.51898
	0.782	19.74	3.9615
	0.697	21.12	3.30019
	0.643	18.87	3.40753
HFDM	1.363	28.55	4.77408	5.13101	0.367887
	1.642	30.13	5.44972
	1.65	31.03	5.31743
	1.271	27.09	4.69177
	1.805	33.29	5.42205
HLJDD_L	1.237	26.28	4.707	4.81472	0.151878
	1.423	30.8	4.62013
	1.359	27.42	4.95624
	1.144	23.04	4.96528
	1.378	28.56	4.82493
HLJDD_M	1.182	27.98	4.22445	4.26947	0.133931
	1.246	28.99	4.29803
	1.263	30.67	4.11803
	1.3	29.02	4.47967
	1.176	27.82	4.22717
HLJDD_H	1.298	29.21	4.44368	4.48602	0.250809
	1.068	26.11	4.09039
	1.378	29.1	4.7354
	1.386	29.73	4.66196
	1.189	26.43	4.49868
ST	1.447	31.73	4.56035	4.3451	0.184414
	1.355	32.38	4.18468
	1.274	29.68	4.29245
	1.254	27.75	4.51892
	1.149	27.56	4.16909

## Sheet: TC
	Optical density	Average value
Blank	0.052	0.054
	0.056
	0.054
Standard 1	0.231	0.242667
	0.265
	0.232
Standard 2	0.188667
	Optical density	Concentration (mmol/L)	Average value	Standard deviation
NC	0.068	2.30184	2.49914	0.270165
	0.07	2.63067
	0.067	2.13742
	0.071	2.79509
	0.07	2.63067
HFDM	0.244	31.2392	29.4306	1.61095
	0.236	29.9239
	0.226	28.2797
	0.22	27.2932
	0.239	30.4171
HLJDD_L	0.221	27.4576	25.4189	1.54499
	0.206	24.9914
	0.195	23.1828
	0.211	25.8135
	0.21	25.649
HLJDD_M	0.197	23.5116	23.6432	2.85584
	0.186	21.703
	0.179	20.5521
	0.224	27.9509
	0.203	24.4981
HLJDD_H	0.185	21.5386	20.585	0.873114
	0.175	19.8945
	0.184	21.3742
	0.179	20.5521
	0.173	19.5656
ST	0.197	23.5116	23.1499	2.24656
	0.214	26.3067
	0.177	20.2233
	0.188	22.0319
	0.198	23.676

## Sheet: TG
	Optical density	Average value
Blank	0.051	0.0543333
	0.054
	0.058
Standard 1	0.213	0.213667
	0.222
	0.206
Standard 2	0.159333
	Optical density	Concentration (mmol/L)	Average value	Standard deviation
NC	0.128	1.0449	1.33992	0.485109
	0.132	1.10163
	0.144	1.27184
	0.209	2.19381
	0.131	1.08745
HFDM	0.329	3.8959	4.48879	1.03161
	0.418	5.15828
	0.476	5.98096
	0.316	3.71151
	0.315	3.69732
HLJDD_L	0.244	2.69025	3.09875	0.308712
	0.295	3.41364
	0.29	3.34272
	0.278	3.17251
	0.257	2.87464
HLJDD_M	0.294	3.39946	3.12145	0.276608
	0.248	2.74699
	0.283	3.24343
	0.26	2.9172
	0.287	3.30017
HLJDD_H	0.275	3.12996	2.88315	0.17244
	0.243	2.67607
	0.256	2.86046
	0.251	2.78954
	0.263	2.95975
ST	0.203	2.1087	2.20515	0.353523
	0.173	1.68318
	0.225	2.42075
	0.209	2.19381
	0.239	2.61933

## Sheet: LDL-C
	A2	A1	A2－A1	Average value
Blank	0.064	0.05	0.014	0.0133333
	0.068	0.054	0.014
	0.066	0.054	0.012
Standard 1	0.208	0.069	0.139	0.134333
	0.2	0.068	0.132
	0.195	0.063	0.132
Standard 2	0.121
	A2	A1	A2－A1	Concentration (mmol/L)	Average value	Standard deviation
NC	0.072	0.055	0.017	0.436364	0.458182	0.091272
	0.072	0.054	0.018	0.545455
	0.072	0.056	0.016	0.327273
	0.073	0.055	0.018	0.545455
	0.073	0.056	0.017	0.436364
HFDM	0.258	0.078	0.18	18.2182	20.7927	2.35318
	0.293	0.075	0.218	22.3636
	0.29	0.071	0.219	22.4727
	0.248	0.068	0.18	18.2182
	0.299	0.078	0.221	22.6909
HLJDD_L	0.217	0.066	0.151	15.0545	14.2691	1.27548
	0.197	0.073	0.124	12.1091
	0.213	0.06	0.153	15.2727
	0.212	0.069	0.143	14.1818
	0.207	0.059	0.148	14.7273
HLJDD_M	0.193	0.071	0.122	11.8909	12.5236	1.72212
	0.198	0.065	0.133	13.0909
	0.186	0.064	0.122	11.8909
	0.18	0.07	0.11	10.5818
	0.221	0.069	0.152	15.1636
HLJDD_H	0.172	0.069	0.103	9.81818	9.79636	0.312389
	0.171	0.066	0.105	10.0364
	0.168	0.065	0.103	9.81818
	0.174	0.069	0.105	10.0364
	0.16	0.062	0.098	9.27273
ST	0.154	0.055	0.099	9.38182	10.3636	0.702769
	0.163	0.056	0.107	10.2545
	0.17	0.058	0.112	10.8
	0.18	0.064	0.116	11.2364
	0.162	0.056	0.106	10.1455

## Sheet: sdLDL
Standard concentration	4	2	1	0.5	0.25	0
A1（Standard wells）	2.644	1.334	0.682	0.384	0.21	0.064
A2（Standard wells）	2.577	1.335	0.694	0.392	0.212	0.065
Average value	2.6105	1.3345	0.688	0.388	0.211	0.0645
	Optical density	Concentration (mmol/L)	Average value	Standard deviation
NC	0.5	3.45623	3.50173	0.0781293
	0.514	3.56605
	0.518	3.59743
	0.503	3.47976
	0.494	3.40916
HFDM	0.559	3.91905	3.77	0.139003
	0.533	3.71509
	0.519	3.60527
	0.558	3.9112
	0.531	3.6994
HLJDD_L	0.5	3.45623	3.61782	0.091413
	0.527	3.66803
	0.524	3.64449
	0.524	3.64449
	0.528	3.67587
HLJDD_M	0.516	3.58174	3.49074	0.0631459
	0.496	3.42485
	0.498	3.44054
	0.508	3.51898
	0.504	3.48761
HLJDD_H	0.489	3.36994	3.37935	0.199021
	0.455	3.10323
	0.478	3.28365
	0.513	3.55821
	0.516	3.58174
ST	0.505	3.49545	3.62567	0.0767787
	0.531	3.6994
	0.523	3.63665
	0.525	3.65234
	0.524	3.64449

## Sheet: HDL-C
	A2	A1	A2－A1	Average value
Blank	0.055	0.049	0.006	0.007
	0.061	0.053	0.008
	0.058	0.051	0.007
Standard 1	0.11	0.066	0.044	0.043
	0.111	0.066	0.045
	0.105	0.065	0.04
Standard 2	0.036
	A2	A1	A2－A1	Concentration (mmol/L)	Average value	Standard deviation
NC	0.161	0.051	0.11	3.00417	2.82333	0.211735
	0.151	0.054	0.097	2.625
	0.167	0.054	0.113	3.09167
	0.157	0.056	0.101	2.74167
	0.152	0.054	0.098	2.65417
HFDM	0.215	0.187	0.028	0.6125	0.4725	0.113713
	0.198	0.176	0.022	0.4375
	0.208	0.186	0.022	0.4375
	0.209	0.191	0.018	0.320833
	0.219	0.193	0.026	0.554167
HLJDD_L	0.206	0.181	0.025	0.525	0.705833	0.153506
	0.21	0.176	0.034	0.7875
	0.238	0.206	0.032	0.729167
	0.202	0.175	0.027	0.583333
	0.214	0.176	0.038	0.904167
HLJDD_M	0.205	0.153	0.052	1.3125	1.33	0.319238
	0.225	0.187	0.038	0.904167
	0.228	0.181	0.047	1.16667
	0.211	0.145	0.066	1.72083
	0.232	0.172	0.06	1.54583
HLJDD_H	0.222	0.164	0.058	1.4875	1.28917	0.347194
	0.215	0.176	0.039	0.933333
	0.224	0.156	0.068	1.77917
	0.215	0.173	0.042	1.02083
	0.218	0.169	0.049	1.225
ST	0.194	0.136	0.058	1.4875	1.3825	0.0671467
	0.214	0.162	0.052	1.3125
	0.228	0.174	0.054	1.37083
	0.22	0.167	0.053	1.34167
	0.195	0.14	0.055	1.4

## Sheet: HDL2
Standard concentration	24	12	6	3	1.5	0
A1（Standard wells）	2.266	1.393	0.767	0.43	0.211	0.067
A2（Standard wells）	2.524	1.505	0.789	0.404	0.21	0.066
Average value	2.395	1.449	0.778	0.417	0.2105	0.0665
	Optical density	Concentration (mmol/L)	Average value	Standard deviation
NC	0.591	23.7054	23.3588	1.34531
	0.548	21.5138
	0.573	22.788
	0.589	23.6035
	0.62	25.1835
HFDM	0.503	19.2202	19.4037	0.820734
	0.489	18.5066
	0.499	19.0163
	0.51	19.577
	0.532	20.6983
HLJDD_L	0.636	25.999	23.6137	1.59491
	0.604	24.368
	0.558	22.0234
	0.568	22.5331
	0.58	23.1448
HLJDD_M	0.601	24.2151	23.7258	0.888372
	0.614	24.8777
	0.574	22.8389
	0.574	22.8389
	0.594	23.8583
HLJDD_H	0.576	22.9409	24.3986	1.24774
	0.639	26.1519
	0.599	24.1131
	0.618	25.0815
	0.591	23.7054
ST	0.719	30.2294	27.4873	1.66309
	0.647	26.5596
	0.658	27.1203
	0.668	27.63
	0.634	25.897

## Sheet: HDL3
Standard concentration	16	8	4	2	1	0
A1（Standard wells）	2.288	1.162	0.597	0.326	0.169	0.063
A2（Standard wells）	2.274	1.186	0.606	0.306	0.167	0.062
Average value	2.281	1.174	0.6015	0.316	0.168	0.0625
	Optical density	Concentration (mmol/L)	Average value	Standard deviation
NC	0.479	15.5357	14.6571	0.507972
	0.45	14.5
	0.451	14.5357
	0.442	14.2143
	0.45	14.5
HFDM	0.473	15.3214	14.5714	0.496801
	0.436	14
	0.457	14.75
	0.448	14.4286
	0.446	14.3571
HLJDD_L	0.473	15.3214	14.2571	0.673572
	0.446	14.3571
	0.443	14.25
	0.428	13.7143
	0.426	13.6429
HLJDD_M	0.468	15.1429	14.8571	0.253798
	0.464	15
	0.459	14.8214
	0.449	14.4643
	0.46	14.8571
HLJDD_H	0.489	15.8929	14.9643	0.912987
	0.464	15
	0.487	15.8214
	0.432	13.8571
	0.443	14.25
ST	0.48	15.5714	15.2143	0.707558
	0.491	15.9643
	0.438	14.0714
	0.472	15.2857
	0.469	15.1786

## Sheet: TMA
Standard concentration	320	160	80	40	20	0
A1（Standard wells）	2.444	1.336	0.75	0.366	0.201	0.058
A2（Standard wells）	2.258	1.407	0.728	0.361	0.196	0.06
Average value	2.351	1.3715	0.739	0.3635	0.1985	0.059
	Optical density	Concentration (ng/mL)	Average value	Standard deviation
NC	0.543	308.889	303.75	8.31305
	0.549	313.056
	0.524	295.694
	0.522	294.306
	0.54	306.806
HFDM	0.653	385.278	359.583	30.2781
	0.667	395
	0.613	357.5
	0.571	328.333
	0.576	331.806
HLJDD_L	0.537	304.722	299.167	20.7696
	0.509	285.278
	0.492	273.472
	0.537	304.722
	0.57	327.639
HLJDD_M	0.545	310.278	273.056	38.0319
	0.498	277.639
	0.457	249.167
	0.417	221.389
	0.54	306.806
HLJDD_H	0.501	279.722	261.944	15.8403
	0.484	267.917
	0.483	267.222
	0.44	237.361
	0.469	257.5
ST	0.519	292.222	282.222	20.9637
	0.529	299.167
	0.518	291.528
	0.453	246.389
	0.504	281.806

[truncated: 2 more sheets: TMAO, WB_FMO3]
