# Supplementary material for: Huang-Lian-Jie-Du-Decoction alleviates atherosclerotic plaque and lipid profile in HFD-induced ApoE-/- mice involve the gut microbiota-mediated TMA/FMO3/TMAO axis
Source: Research Square preprint supplement (doi:10.21203/rs.3.rs-6997421/v1), 2025-07-23
Supplement: Supplementary file 3 [file Supplementary Figure S1.docx]

**Supplementary Figure S1**


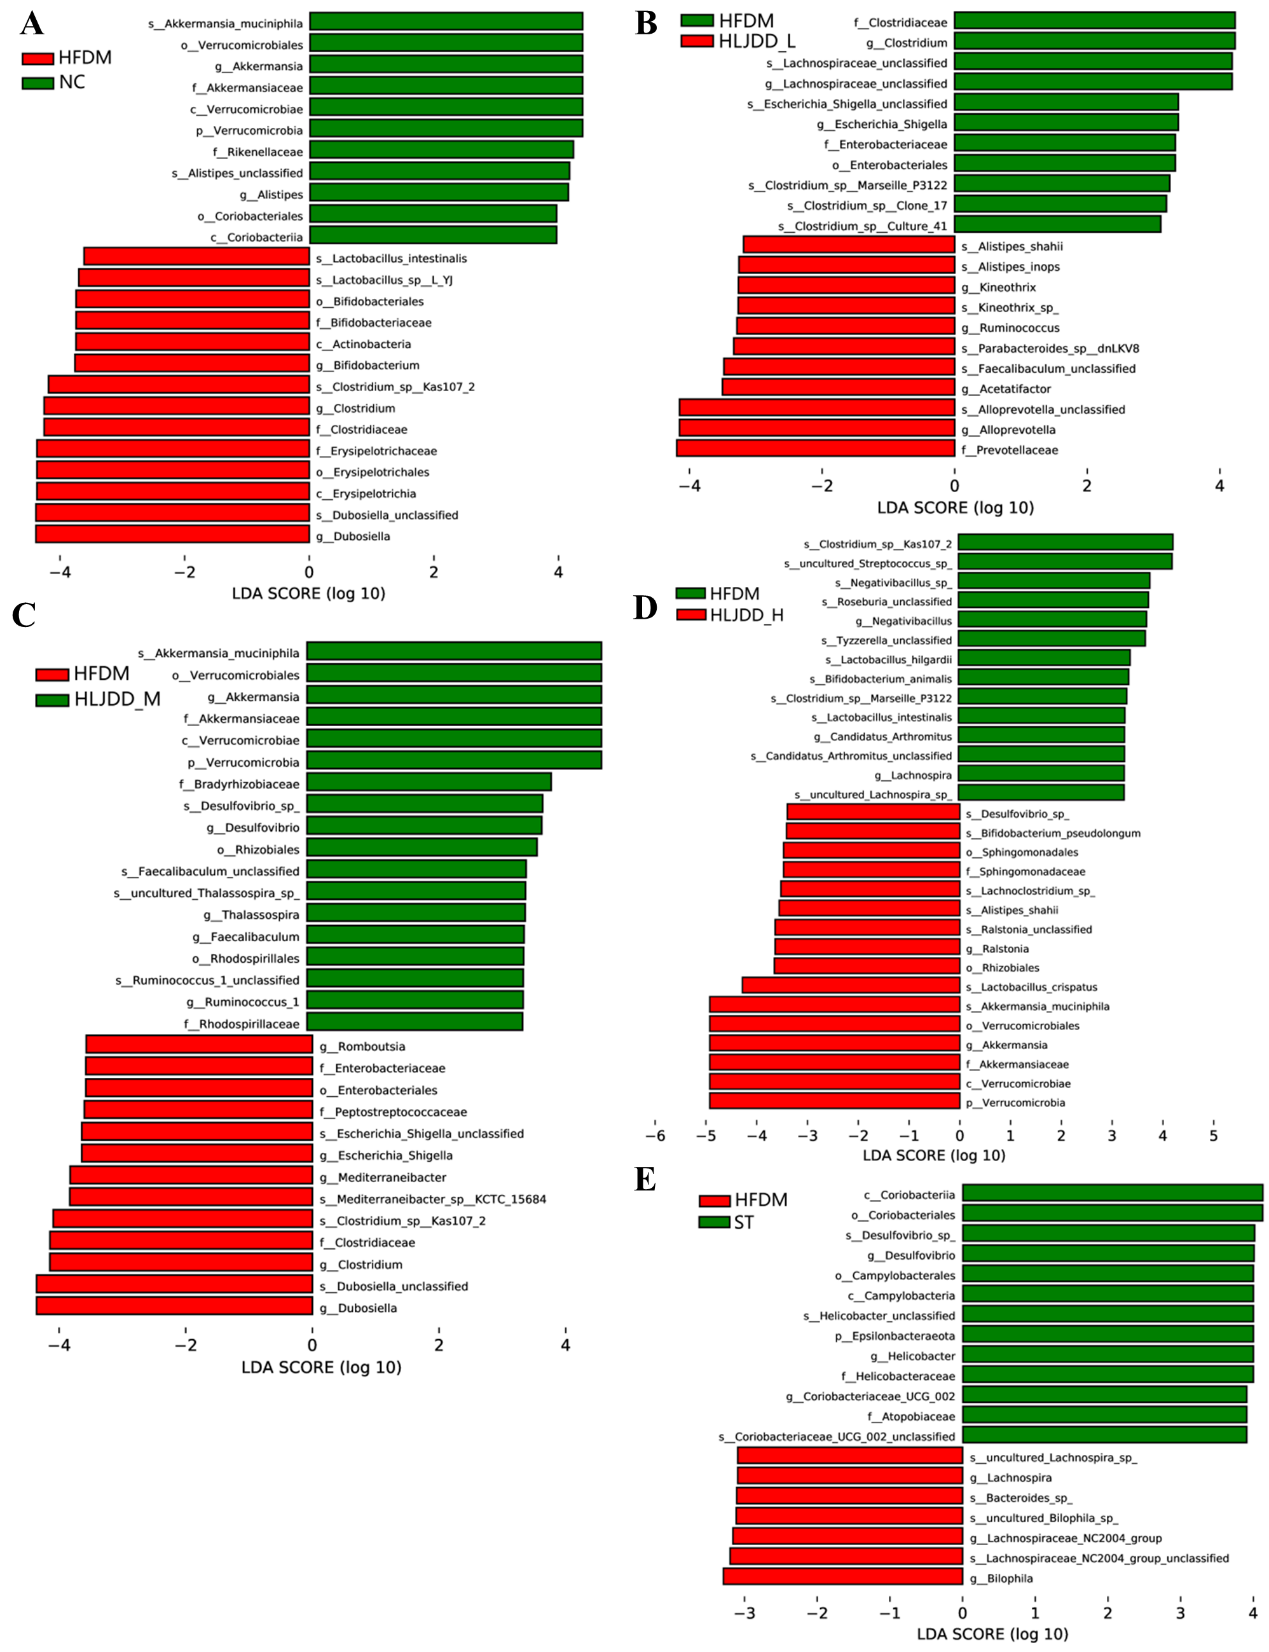


**Figure S1.** Comparisons of the primary differential bacteria between each pair of groups (LDA value > 3). (**A**) HFDM vs NC. (**B**) HFDM vs HLJDD_L. (**C**) HFDM vs HLJDD_M. (**D**) HFDM vs HLJDD_H. (**E**) HFDM vs ST.
