# Supplementary material for: Huang-Lian-Jie-Du-Decoction alleviates atherosclerotic plaque and lipid profile in HFD-induced ApoE-/- mice involve the gut microbiota-mediated TMA/FMO3/TMAO axis
Source: Research Square preprint supplement (doi:10.21203/rs.3.rs-6997421/v1), 2025-07-23
Supplement: Supplementary file 4 [file Supplementary Table S1 and S2.xlsx]

## Sheet: Supplementary Table S1
No.	Identification	RT (min)	Formula	SMILES	Ion mode	Annotation MW (Delta mmu)	m/z	mzCloud match score	Binding energy (kcal/mol)	GI absorption	Lipinski #violations	Ghose #violations	Veber #violations	Egan #violations	Muegge #violations	Bioavailability Score
1	4-Aminobenzoic acid	1.595	C7 H7 N O2	OC(=O)c1ccc(cc1)N	[M+H]+1	137.04768 (-0.13)	138.055	92.1	-6.1	High	0	3	0	0	1	0.85
2	L-Isoleucine	2.327	C6 H13 N O2	CC[C@@H]([C@@H](C(=O)O)N)C	[M+H]+1	131.09463 (-0.22)	132.102	98.8	-5	High	0	2	0	0	1	0.55
3	Ethyl-β-D-glucuronide	3.333	C8 H14 O7	CCO[C@@H]1O[C@H](C(=O)O)C([C@@H](C1O)O)O	[M-H]-1	222.07395 (0.33)	221.066	93.7	-6.7	Low	0	1	0	0	0	0.56
4	Citraconic acid	5.782	C5 H6 O4	OC(=O)/C=C(\C(=O)O)/C	[M-H]-1	130.02661 (1.16)	129.018	99.3	-5.2	High	0	3	0	0	1	0.85
5	5-Hydroxymethyl-2-furaldehyde	5.966	C6 H6 O3	OCc1ccc(o1)C=O	[M+H]+1	126.03169 (-0.30)	127.039	96.7	-5.5	High	0	3	0	0	1	0.55
6	methyl (1S,4aS,6R,7R,7aR)-5,6-dihydroxy-7-methyl-1-{[(2S,3R,4S,5S,6R)-3,4,5-trihydroxy-6-(hydroxymethyl)oxan-2-yl]oxy}-1H,4aH,5H,6H,7H,7aH-cyclopenta[c]pyran-4-carboxylate	7.274	C17 H26 O11	OC[C@H]1OC(O[C@@H]2OC=C(C3C2[C@@H](C)[C@H](C3O)O)C(=O)OC)C([C@H](C1O)O)O	[M-H]-1	406.14751 (0.09)	405.14	92.6	-8.2	Low	2	1	1	1	4	0.11
7	2-Methylbenzoic acid	8.169	C8 H8 O2	OC(=O)c1ccccc1C	[M-H]-1	136.05243 (1.30)	135.044	91.1	-6.5	High	0	3	0	0	1	0.85
8	Salicylic acid	8.344	C7 H6 O3	OC(=O)c1ccccc1O	[M-H]-1	138.03169 (1.14)	137.023	98.6	-6.4	High	0	3	0	0	1	0.85
9	6-Methylquinoline	8.518	C10 H9 N	Cc1ccc2c(c1)cccn2	[M+H]+1	143.07350 (0.03)	144.081	97.7	-7	High	0	1	0	0	2	0.55
10	Salicylic acid	9.097	C7 H6 O3	OC(=O)c1ccccc1O	[M-H]-1	138.03169 (1.13)	137.023	99.2	-6.4	High	0	3	0	0	1	0.85
11	Scopoletin	9.298	C10 H8 O4	COc1cc2ccc(=O)oc2cc1O	[M+H]+1	192.04226 (-0.03)	193.05	97.6	-7.1	High	0	0	0	0	1	0.55
12	Resorcinol monoacetate	9.431	C8 H8 O3	CC(=O)Oc1cccc(c1)O	[M-H]-1	152.04734 (1.02)	151.039	97.8	-6.2	High	0	3	0	0	1	0.55
13	Nalorphine	9.669	C19 H21 N O3	C=CCN1CC[C@@]23[C@@H]4[C@H]1Cc1c3c(O[C@H]2[C@H](C=C4)O)c(cc1)O	[M+H]+1	311.15214 (0.24)	312.159	92.3	-8.3	High	0	0	0	0	0	0.55
14	Benzoic acid	9.682	C7 H6 O2	OC(=O)c1ccccc1	[M-H]-1	122.03678 (1.30)	121.028	99.6	-6	High	0	3	0	0	1	0.85
15	tetrahydropalmatine	9.811	C21 H25 N O4	COc1cc2CCN3C(c2cc1OC)Cc1c(C3)c(OC)c(cc1)OC	[M+H]+1	355.17836 (0.46)	356.185	94.4	-7.8	High	0	0	0	0	0	0.55
16	Terephthalic acid	9.865	C8 H6 O4	OC(=O)c1ccc(cc1)C(=O)O	[M-H]-1	166.02661 (0.95)	165.018	96.6	-6.5	High	0	1	0	0	1	0.85
17	Methyl caffeate	10.402	C10 H10 O4	COC(=O)/C=C/c1ccc(c(c1)O)O	[M+H+MeOH]+1	194.05791 (0.33)	227.091	95.1	-6.8	High	0	0	0	0	1	0.55
18	Vanillin	10.543	C8 H8 O3	COc1cc(C=O)ccc1O	[M+H]+1	152.04734 (0.15)	153.055	98.8	-6	High	0	2	0	0	1	0.55
19	2-Methylbenzoic acid	10.656	C8 H8 O2	OC(=O)c1ccccc1C	[M-H]-1	136.05243 (1.24)	135.044	92.7	-6.5	High	0	3	0	0	1	0.85
20	3-Feruloylquinic acid	11.1	C17 H20 O9	COc1cc(/C=C/C(=O)O[C@@H]2C[C@@](O)(C[C@H]([C@H]2O)O)C(=O)O)ccc1O	[M-H]-1	368.11073 (0.52)	367.103	99.8	-8.5	Low	0	1	1	1	1	0.11
21	Berberine	11.298	C20 H17 N O4	COc1c(OC)ccc2c1c[n+]1CCc3c(c1c2)cc1c(c3)OCO1	[M+H+MeOH]+1	336.12307 (-0.62)	336.122	97.8	-8.4	High	0	0	0	0	0	0.55
22	Phenylacetaldehyde	11.497	C8 H8 O	O=CCc1ccccc1	[M-H]-1	120.05751 (1.26)	119.049	98.5	-5.6	High	0	3	0	0	2	0.55
23	Ferulic acid	11.841	C10 H10 O4	COc1cc(/C=C/C(=O)O)ccc1O	[M+H]+1	194.05791 (-0.06)	195.065	99.7	-6.7	High	0	0	0	0	1	0.85
24	5,7-dihydroxy-2-phenyl-6-[3,4,5-trihydroxy-6-(hydroxymethyl)oxan-2-yl]-8-(3,4,5-trihydroxyoxan-2-yl)-4H-chromen-4-one	12.065	C26 H28 O13	OCC1OC(C(C(C1O)O)O)c1c(O)c(C2OCC(C(C2O)O)O)c2c(c1O)c(=O)cc(o2)c1ccccc1	[M+H]+1	548.15299 (0.62)	549.16	97.5	-10.1	Low	3	3	1	1	3	0.17
25	Ferulic acid	12.152	C10 H10 O4	COc1cc(/C=C/C(=O)O)ccc1O	[M+H]+1	194.05791 (-0.03)	195.065	91.6	-6.6	High	0	0	0	0	1	0.85
26	[(2R,3S,4S,5R,6R)-6-[2-(3,4-dihydroxyphenyl)ethoxy]-3,4,5-trihydroxyoxan-2-yl]methyl (2E)-3-(3,4-dihydroxyphenyl)prop-2-enoate	12.347	C23 H26 O11	O=C(OC[C@H]1O[C@@H](OCCc2ccc(c(c2)O)O)C([C@H](C1O)O)O)/C=C/c1ccc(c(c1)O)O	[M+H]+1	478.14751 (0.14)	479.155	99.2	-8.9	Low	2	0	1	1	3	0.17
27	(2S,3R,4S,5S,6R)-3,4,5-trihydroxy-6-(hydroxymethyl)oxan-2-yl (2E)-3-phenylprop-2-enoate	12.507	C15 H18 O7	OC[C@H]1O[C@@H](OC(=O)/C=C/c2ccccc2)C([C@H](C1O)O)O	[M+H-H2O]+1	310.10525 (0.13)	293.102	98.8	-8	High	0	1	0	0	0	0.55
28	5-hydroxy-3-(5-hydroxy-2,4-dimethoxyphenyl)-6-methoxy-7-{[3,4,5-trihydroxy-6-(hydroxymethyl)oxan-2-yl]oxy}-4H-chromen-4-one	12.549	C24 H26 O13	OCC1OC(Oc2cc3occ(c(=O)c3c(c2OC)O)c2cc(O)c(cc2OC)OC)C(C(C1O)O)O	[M+H]+1	522.13734 (0.09)	523.145	92.1	-8.8	Low	3	1	1	1	3	0.17
29	Spiraeoside	12.926	C21 H20 O12	OC[C@H]1O[C@@H](Oc2ccc(cc2O)c2oc3cc(O)cc(c3c(=O)c2O)O)[C@@H]([C@H]([C@@H]1O)O)O	[M+H]+1	464.09548 (-0.12)	465.103	97.3	-9.2	Low	2	1	1	1	3	0.17
30	Galangin	13.272	C15 H10 O5	Oc1cc(O)c2c(c1)oc(c(c2=O)O)c1ccccc1	[M+H+MeOH]+1	270.05282 (0.05)	303.086	96.9	-7.9	High	0	0	0	0	0	0.55
31	Scutellarin	13.293	C21 H18 O12	OC(=O)[C@H]1O[C@@H](Oc2cc3oc(cc(=O)c3c(c2O)O)c2ccc(cc2)O)[C@@H]([C@H]([C@@H]1O)O)O	[M+H]+1	462.07983 (0.10)	463.087	98.2	-10	Low	2	0	1	1	3	0.11
32	Azelaic acid	13.38	C9 H16 O4	OC(=O)CCCCCCCC(=O)O	[M-H]-1	188.10486 (0.66)	187.097	99.1	-6	High	0	0	0	0	1	0.85
33	5-hydroxy-2-(4-hydroxyphenyl)-6-methoxy-7-{[(2S,3R,4S,5S,6R)-3,4,5-trihydroxy-6-(hydroxymethyl)oxan-2-yl]oxy}-4H-chromen-4-one	13.695	C22 H22 O11	OCC1OC(Oc2cc3oc(cc(=O)c3c(c2OC)O)c2ccc(cc2)O)[C@@H](C([C@@H]1O)O)O	[M+H]+1	462.11621 (-0.03)	463.123	90.6	-9	Low	2	0	1	1	3	0.17
34	MLS002473246	13.723	C15 H12 O4	Oc1ccc(cc1)[C@@H]1OC(=O)c2c(C1)cccc2O	[M+H]+1	256.07356 (0.09)	257.081	93.4	-9	High	0	0	0	0	0	0.55
35	5-hydroxy-3-(4-hydroxyphenyl)-7-{[(2S,3R,4S,5S,6R)-3,4,5-trihydroxy-6-(hydroxymethyl)oxan-2-yl]oxy}-4H-chromen-4-one	13.795	C21 H20 O10	Oc1ccc(cc1)c1coc2c(c1=O)c(O)cc(c2)O[C@@H]1O[C@H](O)C([C@@H](C1O)O)O	[M+H]+1	432.10565 (0.40)	433.112	97.5	-9.5	Low	1	0	1	1	2	0.55
36	Emodin	13.796	C15 H10 O5	Cc1cc(O)c2c(c1)C(=O)c1c(C2=O)c(O)cc(c1)O	[M+H]+1	270.05282 (0.40)	271.06	96.5	-8.7	High	0	0	0	0	0	0.55
37	Limonin	14.249	C26 H30 O8	O=C1OC[C@]23[C@H](C1)OC([C@@H]2CC(=O)[C@@]1([C@@H]3CC[C@@]2([C@]31O[C@@H]3C(=O)O[C@H]2c1cocc1)C)C)(C)C	[M+H]+1	470.19407 (0.24)	471.201	94.8	-9.9	High	0	0	0	0	0	0.55
38	Gnaphaliin	14.888	C17 H14 O6	COc1c(oc2c(c1=O)c(O)cc(c2OC)O)c1ccccc1	[M+H]+1	314.07904 (0.13)	315.086	97.3	-7.8	High	0	0	0	0	0	0.55
39	(2S,3S,4S,5R,6S)-3,4,5-trihydroxy-6-[(5-hydroxy-8-methoxy-4-oxo-2-phenyl-4H-chromen-7-yl)oxy]oxane-2-carboxylic acid	15.249	C22 H20 O11	COc1c(OC2OC(C(=O)O)[C@H](C([C@H]2O)O)O)cc(c2c1oc(cc2=O)c1ccccc1)O	[M+H]+1	460.10056 (0.51)	461.107	98.9	-9.5	Low	1	0	1	1	2	0.11
40	Genistein	15.346	C15 H10 O5	Oc1ccc(cc1)c1coc2c(c1=O)c(O)cc(c2)O	[M-H]-1	270.05282 (0.01)	269.046	95	-8.4	High	0	0	0	0	0	0.55
41	Chrysin	15.663	C15 H10 O4	Oc1cc(O)c2c(c1)oc(cc2=O)c1ccccc1	[M+H]+1	254.05791 (0.21)	255.065	91.2	-7.8	High	0	0	0	0	0	0.55
42	Dihydrooroxylin A	16.171	C16 H14 O5	COc1c(O)cc2c(c1O)C(=O)CC(O2)c1ccccc1	[M+H]+1	286.08412 (-0.01)	287.091	98.4	-8.2	High	0	0	0	0	0	0.55
43	Bis(4-ethylbenzylidene)sorbitol	17.047	C24 H30 O6	CCc1ccc(cc1)C1OC2COC(OC2C(O1)C(CO)O)c1ccc(cc1)CC	[M+H]+1	414.20424 (0.39)	415.211	99.5	-8.6	High	0	0	0	0	0	0.55
44	Dibutyl phthalate	18.417	C16 H22 O4	CCCCOC(=O)c1ccccc1C(=O)OCCCC	[M+H]+1	278.15181 (0.05)	279.159	99.3	-6.1	High	0	0	0	0	0	0.55
45	18-β-Glycyrrhetinic acid	20.539	C30 H46 O4	O=C1C=C2C3C[C@](C)(CC[C@]3(C)CCC2([C@]2(C1[C@@]1(C)CC[C@@H](C(C1CC2)(C)C)O)C)C)C(=O)O	[M+H]+1	470.33961 (0.09)	471.347	90.9	-9.7	High	1	3	0	1	1	0.85
46	4-Methoxycinnamic acid	20.589	C10 H10 O3	COc1ccc(cc1)/C=C/C(=O)O	[M+H-H2O]+1	178.06299 (0.00)	161.06	94.5	-6.8	High	0	0	0	0	1	0.85
47	Dibutyl sebacate	20.9	C18 H34 O4	CCCCOC(=O)CCCCCCCCC(=O)OCCCC	[M+H]+1	314.24571 (0.13)	315.253	96.2	-6.6	High	0	0	1	0	2	0.55
48	Linoleic acid	21.993	C18 H32 O2	CCCCC/C=C\C/C=C\CCCCCCCC(=O)O	[M-H]-1	280.24023 (-0.02)	279.233	98.9	-5.9	High	0	0	1	0	2	0.55
49	Ethyl myristate	22.538	C16 H32 O2	CCCCCCCCCCCCCC(=O)OCC	[M-H]-1	256.24023 (0.05)	255.233	98.9	-6.3	High	1	0	1	0	1	0.55
50	Stearamide	22.675	C18 H37 N O	CCCCCCCCCCCCCCCCCC(=O)N	[M+H]+1	283.28751 (0.35)	284.294	94.1	-6.6	High	1	1	1	0	2	0.55
51	Oleic acid	22.758	C18 H34 O2	CCCCCCCC/C=C\CCCCCCCC(=O)O	[M-H]-1	282.25588 (-0.15)	281.249	99.2	-6.8	High	1	1	1	1	1	0.85
52	Di(2-ethylhexyl) phthalate	22.889	C24 H38 O4	CCCCC(COC(=O)c1ccccc1C(=O)OCC(CCCC)CC)CC	[M+H]+1	390.27701 (0.65)	391.284	99.3	-6.7	High	1	1	1	1	2	0.55
53	Tridemorph	23.706	C19 H39 N O	CCCCCCCCCCCCCN1CC(C)OC(C1)C	[M+H]+1	297.30316 (0.29)	298.31	94.5	-7	High	0	0	1	0	1	0.55
54	Docosanamide	25.659	C22 H45 N O	CCCCCCCCCCCCCCCCCCCCCC(=O)N	[M+H]+1	339.35011 (0.73)	340.357	97.9	-5.4	Low	1	1	1	1	2	0.55

## Sheet: Supplementary Table S2
Identification	Formula	Binding energy (kcal/mol)	GI absorption	Violations of drug-likeness rules	Source herb
Limonin	C26 H30 O8	-9.9	High	0	CC, PC
MLS002473246	C15 H12 O4	-9	High	0	Unknown
Emodin	C15 H10 O5	-8.7	High	0	Unknown
Bis(4-ethylbenzylidene)sorbitol	C24 H30 O6	-8.6	High	0	Unknown
Berberine	C20 H17 N O4	-8.4	High	0	CC, PC
Genistein	C15 H10 O5		High	0	Unknown
Nalorphine	C19 H21 N O3	-8.3	High	0	Unknown
Dihydrooroxylin A	C16 H14 O5	-8.2	High	0	SB
(2S,3R,4S,5S,6R)-3,4,5-trihydroxy-6-(hydroxymethyl)oxan-2-yl (2E)-3-phenylprop-2-enoate	C15 H18 O7	-8	High	1	Unknown
Galangin	C15 H10 O5	-7.9	High	0	Unknown
tetrahydropalmatine	C21 H25 N O4	-7.8	High	0	PC
Gnaphaliin	C17 H14 O6		High	0	Unknown
Chrysin	C15 H10 O4		High	0	SB, PC, GJ
Scopoletin	C10 H8 O4	-7.1	High	0	Unknown
6-Methylquinoline	C10 H9 N	-7	High	2	Unknown
Tridemorph	C19 H39 N O		High	2	Unknown
